# Supplementary material
Source: PubMed Central journal article supplement (PMC5377807)
Supplement: 10.1074_M116.757518_jbc.M116.757518-2.pdf [file 10.1074_M116.757518_jbc.M116.757518-2.pdf]

## Supplementary materials;

Supplementary Table 1. It summarizes the results of the Sequence Harmony analysis. Residues that are close to the binding pocket and determine specificity are shown.

Supplementary Figure 1. Experimental strategy. A) Structure of the phosphorylated peptide microarrays used to profile the human PTP domains substrate specificity. Three identical sub-arrays of 6,400 spots were printed on the chip surface. Each sub-array is formed by a 4x4 grid and each small grid unit contains phosphorylated peptides and control spots. B) Microarrays were incubated with the trapping mutants of Protein Tyrosine Phosphatases, expressed as GST fusion-proteins. The interaction signal was revealed by an anti-GST antibody conjugated to a fluorophore. C) The signal of each spot was measured with a laser scanner (Perkin Elmer) and peptides were ranked according to spot fluorescence intensity. The color of each spot is related to fluorescence intensity. Warm and cold colors indicate high and low fluorescence intensity respectively; black represents no signal.

**Supplementary Figure 2.** Kinetic analysis of phospho-peptide dephosphorylation. Purified enzyme, 1 µg/ml, was incubated with one of 10 phosphopeptides (100 µM) for 30 minutes. The release of phosphate was monitored every 5 minutes by incubating with Malachite Green.

Supplementary File 1. Multisequence alignment of the phosphatase domains. The residues at position 59 are highlighted.

Supplementary spreadsheet 1. It is a table reporting the data of the chip experiments

*Supplementary Table 1*

| Alignment position | Diagnostic esidues                                      | Sequence in PTP1B |
|--------------------|---------------------------------------------------------|-------------------|
| 54                 | R in group 5<br>K in other groups                       | KN <b>R</b> NR    |
| 59                 | D or N                                                  | YR <b>D</b> VS    |
| 306                | L in group 5 and 7, Y in other groups                   | DQ <b>L</b> RF    |
| 309                | V in group 3<br>S in group 5<br>I, V, L in other groups | RF <b>S</b> YL    |
| 312                | Conserved A<br>C in group 6                             | YL <b>A</b> VI    |

Supplementary Figure 1

A

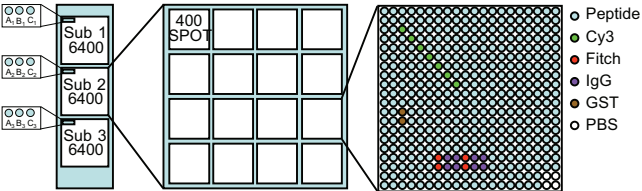

B

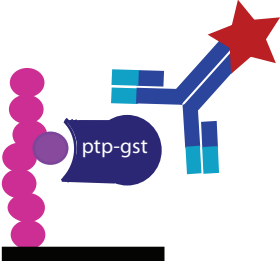

C

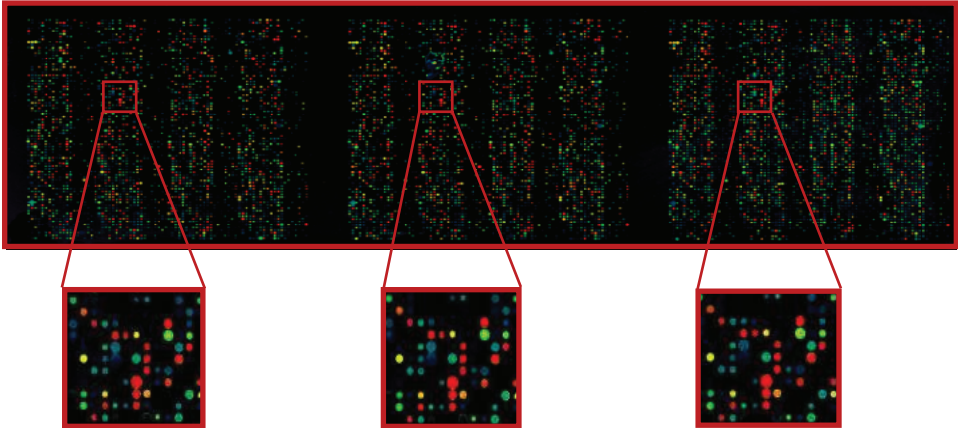

Supplementary Figure 2

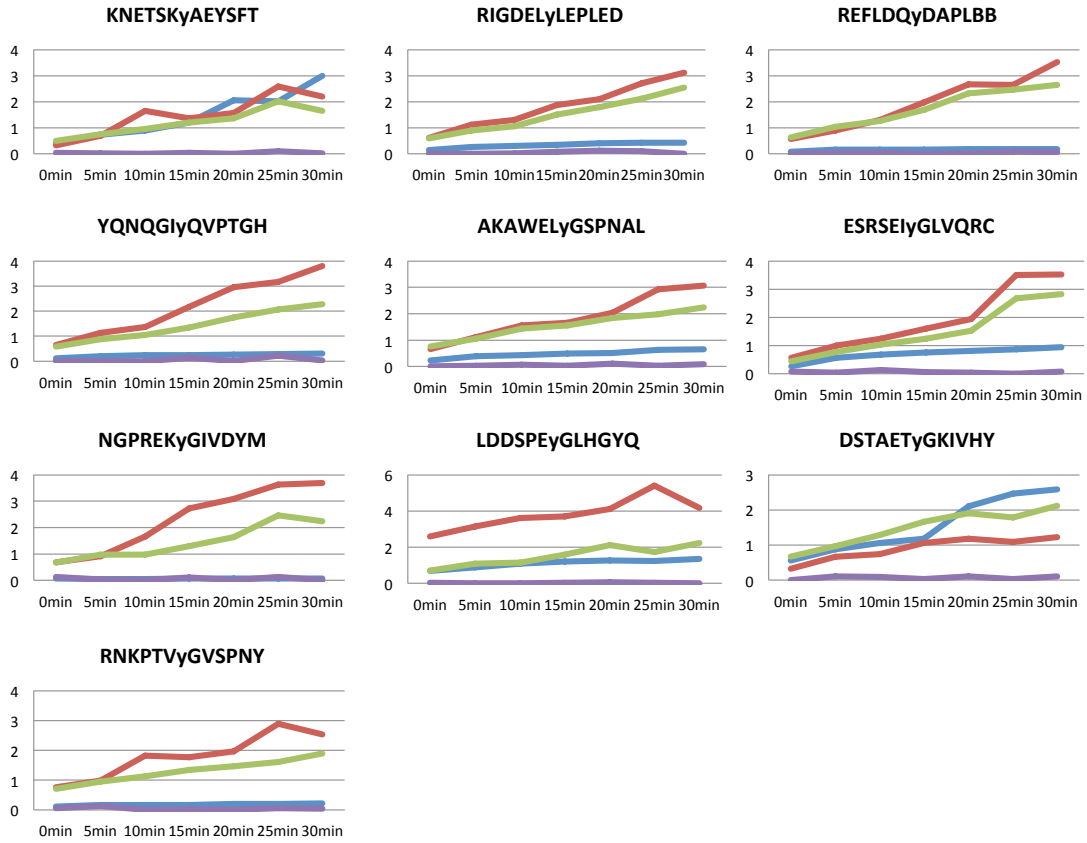

Supplementary file 1

FileUp

MSF: 318 Type: P Check: 7453 ..

Name: hDEP1\_PTPRJ oo Len: 318 Check: 6934 Weight: 6.6  
Name: hPTPbeta\_PTPRB oo Len: 318 Check: 1819 Weight: 6.5  
Name: hSAP1\_PTPRH oo Len: 318 Check: 706 Weight: 7.1  
Name: hLAR\_PTPRF oo Len: 318 Check: 4133 Weight: 6.9  
Name: hPTPalpha\_PTPRA oo Len: 318 Check: 3879 Weight: 6.9  
Name: hSHP1\_PTPN6 oo Len: 318 Check: 8310 Weight: 6.1  
Name: hSHP2\_PTPN11 oo Len: 318 Check: 5676 Weight: 6.0  
Name: hPTPBAS\_PTPN13 oo Len: 318 Check: 7247 Weight: 7.7  
Name: hLyPTP\_PTPN22 oo Len: 318 Check: 2204 Weight: 5.8  
Name: hPEST\_PTPN12 oo Len: 318 Check: 8858 Weight: 5.9  
Name: hPTP1B\_PTPN1 oo Len: 318 Check: 9520 Weight: 6.2  
Name: hTCPTP\_PTPN2 oo Len: 318 Check: 6952 Weight: 6.1  
Name: hMEG2\_PTPN9 oo Len: 318 Check: 5562 Weight: 8.3  
Name: hMEG1\_PTPN4 oo Len: 318 Check: 4777 Weight: 6.5  
Name: hPTPH1\_PTPN3 oo Len: 318 Check: 3088 Weight: 6.7  
Name: hHDPTP\_PTPN23 oo Len: 318 Check: 7788 Weight: 8.2

//

|                 |            |            |             |             |             |
|-----------------|------------|------------|-------------|-------------|-------------|
| hDEP1_PTPRJ     | .....E     | NFEAYFKKQQ | ADSNCGFAEE  | YEDLKLVGIS  | QPKYAAELAE  |
| hPTPbeta_PTPRB  | .....N     | QFEGHFMKLQ | ADSNYLLSKE  | YEELKDVGRN  | QSCDIALLPE  |
| hSAP1_PTPRH     | .....E     | DFADHVRKNE | RDSNCGFADE  | YQQLSLVGHS  | QSQMVASASE  |
| hLAR_PTPRF      | .....T     | DLADNIERLK | ANDGLKFSQE  | YESIDPG.QQ  | FTWENSNLEV  |
| hPTPalpha_PTPRA | .....D     | KLEEEINRRM | ADDNKLFREE  | FNALPACPIQ  | ATCEAASKKEE |
| hSHP1_PTPN6     | .          | ADIENRVLE  | LNKKQES EDT | AKAGFWEEFE  | SLQKQEVKNL  |
| hSHP2_PTPN11    | .          | AEIESRVRE  | LSKLAETTDK  | VKQGFWEFE   | TLQQQECKLL  |
| hPTPBAS_PTPN13  | .          | ANLKS VIRV | LRGLLDQG..  | .....IPSKE  | LENLQELKPL  |
| hLyPTP_PTPN22   | .          | EILQFLDE   | AQSKKITKEE  | FANEFLKLR   | QSTKYKADKT  |
| hPEST_PTPN12    |            | RKFIQRVQAM | KSPDHNGEDN  | FARDFMRLRR  | LSTKYRTEKI  |
| hPTP1B_PTPN1    | .....M     | EMEKEFEQID | KSGS..WAAI  | YQDIRHEAD   | FPCRVAKLPK  |
| hTCPTP_PTPN2    | .....T     | TIEREFEELD | TQRR..WQPL  | YLEIRNESH   | YPHRVAKFPE  |
| hMEG2_PTPN9     | .....M     | TIQELVDYVN | ARQKQGIYEE  | YEDIRREN PV | GTFFHCSMSPG |
| hMEG1_PTPN4     | .....HS    | LRESMIQLAE | GLITGTVLTO  | FDQLYRKKPG  | MTMSCAKLPQ  |
| hPTPH1_PTPN3    | .....DT    | LEGSMAQLK  | GLES GTVLIQ | FEQLYRKKPG  | LAITFAKLPO  |
| hHDPTP_PTPN23   | ..ERLRQLQQ | ELEAFRGQLG | DVGALDTVWR  | ELQDAQEHDA  | RGRSIAIARC  |

|                 |  |                                    |             |             |            |            |
|-----------------|--|------------------------------------|-------------|-------------|------------|------------|
| hDEP1_PTPRJ     |  | NRG <b>K</b> NRYNV                 | LPYDISRVKL  | S.VQTHST.D  | DYINANYMPG | YHSK.....  |
| hPTPbeta_PTPRB  |  | NRG <b>K</b> NRYN <b>I</b>         | LPYDATTRVKL | SNVDDDDPC.S | DYINASYIPG | NNFR.....  |
| hSAP1_PTPRH     |  | NNA <b>K</b> NRYR <b>N</b>         | LPYDWSRVPL  | KPIHEEPG.S  | DYINASFMPG | LWSP.....  |
| hLAR_PTPRF      |  | NKP <b>K</b> NRYAN <b>V</b>        | IAYDHSRVIL  | TSIDGVPG.S  | DYINANYIDG | YRKQ.....  |
| hPTPalpha_PTPRA |  | NKE <b>K</b> NRYV <b>N</b>         | LPYDHSRVHL  | TPVEGVDP.S  | DYINASFING | YQEK.....  |
| hSHP1_PTPN6     |  | NKG <b>K</b> NRYK <b>N</b>         | LFPDHSRVIL  | QGRDSNIPGS  | DYINANYIKN | QLLGPDEN.. |
| hSHP2_PTPN11    |  | NKN <b>K</b> NRYK <b>N</b>         | LFPDHTRVVL  | HDGDPNEPVS  | DYINANIIMP | EFETKCNNK  |
| hPTPBAS_PTPN13  |  | NR <b>R</b> <b>K</b> NRYK <b>N</b> | LPYDATTRVKL | GDE.....G   | GYINASFIKI | PVGK.....  |
| hLyPTP_PTPN22   |  | NIK <b>K</b> NRYK <b>D</b>         | LPYDYSRVEL  | SLITSDDED.S | SYINANFIK  | GYGP.....  |
| hPEST_PTPN12    |  | NV <b>K</b> NRYK <b>D</b>          | LFPDHSRVKL  | TLKTPSQD.S  | DYINANFIK  | GYGP.....  |
| hPTP1B_PTPN1    |  | NKN <b>R</b> NRYR <b>D</b>         | SPFDHSRIKL  | HQ.....EDN  | DYINASLIK  | EEAQ.....  |
| hTCPTP_PTPN2    |  | NRN <b>R</b> NRYR <b>D</b>         | SPYDHSRVKL  | QN.....AEN  | DYINASLVDI | EEAQ.....  |
| hMEG2_PTPN9     |  | NLE <b>K</b> NRYG <b>D</b>         | PCLDQTRVKL  | TKRSGH.TQT  | DYINASFMDG | YKQK.....  |
| hMEG1_PTPN4     |  | NIS <b>K</b> NRYR <b>D</b>         | SPYDATTRVKL | KGN.....E   | DYINANYINM | EIPSSS.... |
| hPTPH1_PTPN3    |  | NLD <b>K</b> NRYK <b>D</b>         | LPYDATTRVLL | QGN.....E   | DYINASYVNM | EIPAA..... |
| hHDPTP_PTPN23   |  | YSL <b>K</b> NRHQ <b>D</b>         | MPYDSNRVVL  | RSKG.....D  | DYINASCVEG | LSPYCP.... |

|                 |             |            |            |             |            |
|-----------------|-------------|------------|------------|-------------|------------|
| hDEP1_PTPRJ     | ..KDFIATQG  | PLPNTLKDFW | RMVWEKNVYA | IIMLTCKVEQ  | GRTKCEEYWP |
| hPTPbeta_PTPRB  | ..REYIVTQG  | PLPGTKDDFW | KMVWEQNVHN | IVMVTQCVEK  | GRVKCDHYWP |
| hSAP1_PTPRH     | ..QEFIATQG  | PLPQTVGDFW | RLVWEQSQHT | LVMLTNCMEA  | GRVKCEHYWP |
| hLAR_PTPRF      | ..NAYIATQG  | PLPETMGDFW | RMVWEQRTAT | VVMTRLEEK   | SRVKCDQYWP |
| hPTPalpha_PTPRA | ..NKFIAAQG  | PKEETVNDWF | RMIWEQNTAT | IVMVTNLKER  | KECKCAQYWP |
| hSHP1_PTPN6     | ..AKTYIASQG | CLEATVNDWF | QMAWQENSRV | IVMTTREVVEK | GRNKCVPYWP |
| hSHP2_PTPN11    | PKKSYIATQG  | CLQNTVNDWF | RMVFQENSRV | IVMTTKEVER  | GKSKCVKYWP |
| hPTPBAS_PTPN13  | EEFVYIACQG  | PLPTTVGDFW | QMIWEQKSTV | IAMMTQEVVEG | EKIKCQRYWP |
| hLyPTP_PTPN22   | ..KAYIATQG  | PLSTLLDFW  | RMIWEYSVLI | IGMACMEYEM  | GKKKCERYWA |
| hPEST_PTPN12    | ..KAYVATQG  | PLANTVIDFW | RMIWEYNVVI | IVMACREFEM  | GRKKCERYWP |
| hPTP1B_PTPN1    | ..RSYILTQG  | PLPNTCGHFW | EMVWEQKSRG | VVMLNRVMEK  | GSLKCAQYWP |
| hTCPTP_PTPN2    | ..RSYILTQG  | PLPNTCCHFW | LMVWQKTKA  | VVMLNRIVEK  | ESVKCAQYWP |

|               |            |            |            |            |            |
|---------------|------------|------------|------------|------------|------------|
| hMEG2_PTPN9   | ..NAYIGTQG | PLENTYRDFW | LMVWEQKVLV | IVMTTRFEEG | GRRKCGQYWP |
| hMEG1_PTPN4   | IINQYIACQG | PLPHTCTDFW | QMTWEQGSSM | VVMLTTQVER | GRVKCHQYWP |
| hPTPH1_PTPN3  | LVNKYIATQG | PLPHTCAQFW | QVVVDQKLSL | IVMLTTLTER | GRTKCHQYWP |
| hHDPTP_PTPN23 | ...PLVATQA | PLPGTAADFV | LMVHEQKVSV | IVMLVSEAM  | EKQKVARYFP |

|                     |            |            |            |            |            |
|---------------------|------------|------------|------------|------------|------------|
| hDEP1_PTPRJ         | SKQ.AQDYG. | ..DITVAMTS | EIVLPEWTIR | DFTVKN.... | IQTSESHPLR |
| hPTPbeta_PTPRB      | ADQDSLYYG. | ..DLILQMLS | ESVLPEWTIR | EFKICGE... | EQLDAHRLIR |
| hSAP1_PTPRH         | LDSQPCTHG. | ..HLRVTLVG | EEVMENWTVR | ELLLLQ.... | VEEQKTLNVR |
| hLAR_PTPRF          | ARG.TETCG. | ..LIQVTLTD | TVELATYTVR | TFALHKSGSS | EKRE....LR |
| hPTPalphalpha_PTPRA | DQG.CWTYG. | ..NIRVSVED | VTVLVDYTVR | KFCIQQVGD  | TNRKPQRLIT |
| hSHP1_PTPN6         | EVGMQRAYG. | ..PYSVTNCG | EHDTEYKLR  | TLQVSP...  | DNGDLIREIW |
| hSHP2_PTPN11        | DEYALKEYG. | ..VMRVRNVK | ESAAHDYTLR | ELKLSKV... | GQGNTERTVW |
| hPTPBAS_PTPN13      | NILGKTTMVS | N.RLRLALVR | MQQLKGFVVR | AMTLEDI... | QTR.EVRHIS |
| hLyPTP_PTPN22       | EPVEMQLEFG | ..PFSVSCFA | EKRKSDYIIR | TLKVKN...  | SET...RTIY |
| hPEST_PTPN12        | LYGEDPITFA | ..PFKISCED | EQARTDYFIR | TLLELFQ... | NES...RRLY |
| hPTP1B_PTPN1        | QKEEKEMIFE | DTNLKLTLLS | EDIKSYTVR  | QLELENLT.. | ..TQETREIL |
| hTCPTP_PTPN2        | .TDDQEMLFK | ETGFSVKLLS | EDVKSYYTVH | LLQLENIN.. | ..SGETRTIS |
| hMEG2_PTPN9         | LEKDSRIRFG | ..FLTVTNLG | VENMNHKKYK | TLEIHNT... | ..ERQKRQVT |
| hMEG1_PTPN4         | EPTGSSSYG. | ..CYQVTCFS | EEGNTAYIFR | KMTLNFQ... | ..KNESRPLT |
| hPTPH1_PTPN3        | DPPDVMNHG. | ..GFHIQCQS | EDCTIAYVSR | EMLVTNTQ.. | ..TGEEHTVT |
| hHDPTP_PTPN23       | TERGQPMVHG | ..ALSLALSS | VRSTETHVER | VLSLQFRD.. | ..QSLKRSLV |

|                     |            |            |            |             |            |
|---------------------|------------|------------|------------|-------------|------------|
| hDEP1_PTPRJ         | QFHFTSWPDH | GVPDTTDLI  | NFRYLVRDYM | KQSPPE...   | .....PI    |
| hPTPbeta_PTPRB      | HFHYTVWPDH | GVPETTQSLI | QFVRTVRDYI | NRSPGAG...  | .....PT    |
| hSAP1_PTPRH         | QFHYQAWPDH | GVPSSPDTL  | AFWRMLRQWL | DQTMEGG...  | .....PP    |
| hLAR_PTPRF          | QFQFMAWPDH | GVPEYPTPIL | AFLRRVKACN | ..PLDAG...  | .....PM    |
| hPTPalphalpha_PTPRA | QFHFTSWPDF | GVPFTPIGML | KFLKVKACN  | ..PQYAG...  | .....AI    |
| hSHP1_PTPN6         | HYQYLSWPDH | GVPSEPGGVL | SFLDQINQRQ | ESLPHAG...  | .....PI    |
| hSHP2_PTPN11        | QYHFRTWPDH | GVPSPDGGVL | DFLEEVHKKQ | ESIMDAG...  | .....PV    |
| hPTPBAS_PTPN13      | HLNFTAWPDH | DTPSQPDDL  | TFISYMRHII | R....SG...  | .....PI    |
| hLyPTP_PTPN22       | QFHYKNWPDH | DVPSSIDPIL | ELIWDVRCYQ | ED..DSV...  | .....PI    |
| hPEST_PTPN12        | QFHYVNWPDH | DVPSSFDISL | DMISLMRKYQ | EH..EDV...  | .....PI    |
| hPTP1B_PTPN1        | HFHYTTWPDF | GVPEPASFL  | NFLFKVRESG | SLSPEHG...  | .....PV    |
| hTCPTP_PTPN2        | HFHYTTWPDF | GVPEPASFL  | NFLFKVRESG | SLNPDHG...  | .....PA    |
| hMEG2_PTPN9         | HFQFLSWPDY | GVPSSAASLI | DFLRVVRNQQ | SLAVSNMGAR  | SKGQCPEPPI |
| hMEG1_PTPN4         | QIQYIAWPDH | GVPDSSDFL  | DFVCHVRNKR | ...AGKEE... | .....PV    |
| hPTPH1_PTPN3        | HLQYVAWPDH | GVPDSSDFL  | EFVNYVRSR  | ...VDSE...  | .....PL    |
| hHDPTP_PTPN23       | HLHFPTWPEL | GLPDSPSNLL | RFIQEVHAHY | LHQRPHT...  | .....PI    |

|                     |            |            |             |            |            |
|---------------------|------------|------------|-------------|------------|------------|
| hDEP1_PTPRJ         | LVHCSAGVGR | TGTFIAIDRL | IYQIE...NE  | NTVDVYGIVY | DLRMHRPLMV |
| hPTPbeta_PTPRB      | VVHCSAGVGR | TGTFIALDRI | LQQLD...SK  | DSVDIYGAVH | DLRLHRVHMV |
| hSAP1_PTPRH         | IVHCSAGVGR | TGTFIALDVL | LRQLQ...SE  | GLLGPFSFVR | KMRSRPLMV  |
| hLAR_PTPRF          | VVHCSAGVGR | TGCFIVIDAM | LERMK...HE  | KTVDIYGHVT | KMSQRNYMV  |
| hPTPalphalpha_PTPRA | VVHCSAGVGR | TGTFVVIDAM | LDMMH...TE  | RKVDVYGFVS | RIRAQRQCMV |
| hSHP1_PTPN6         | IVHCSAGIGR | TGTIIVIDML | MENISTKGLD  | CDIDIQKTIQ | MVRAQRSGMV |
| hSHP2_PTPN11        | VVHCSAGIGR | TGTFIVIDIL | IDIIREKQVD  | CDIDVPKTIQ | MVRSQRSGMV |
| hPTPBAS_PTPN13      | ITHCSAGIGR | SGTLCIDIVV | LGLIS...QD  | LDFDISDLVR | CMRLQRHGMV |
| hLyPTP_PTPN22       | CIHCSAGCGR | TGVICADYI  | WMLLKDGII   | ENFSVFLIR  | EMRTQRPSLV |
| hPEST_PTPN12        | CIHCSAGCGR | TGAICAIDYT | WNLLKAGKIP  | EEFNVFNLIQ | EMRTQRHSAV |
| hPTP1B_PTPN1        | VVHCSAGIGR | SGTFCLADTC | LLLMDKRKDP  | SSVDIKKVL  | EMRKFMRGLI |
| hTCPTP_PTPN2        | VIHCSAGIGR | SGTFFSLVDT | LVLMEKGD... | ..INIKQVLL | NMRKYRMGLI |
| hMEG2_PTPN9         | VVHCSAGIGR | TGTFCSLDIC | LAQLEELGT.  | ..LNVFQTVS | RMRTQRAFSA |
| hMEG1_PTPN4         | VVHCSAGIGR | TGVLITMETA | MCLIECN...  | QPVYPLDIVR | TMRDQRAMMI |
| hPTPH1_PTPN3        | LVHCSAGIGR | TGVLVTMETA | MCLTERN...  | LPIYPLDIVR | KMRDQRAMMV |
| hHDPTP_PTPN23       | IVHCSSGVGR | TGAFALLYAA | VQEVEAG...N | GIPELPQLVR | RMRQQRKHM  |

|                     |             |                 |
|---------------------|-------------|-----------------|
| hDEP1_PTPRJ         | QTEDQYVFLN  | <b>QCVLDIVR</b> |
| hPTPbeta_PTPRB      | QTECQYVYLH  | <b>QCVRDVL</b>  |
| hSAP1_PTPRH         | QTEAQYVFLH  | <b>QCICGSSN</b> |
| hLAR_PTPRF          | QTEDQYVFIH  | <b>EALAEAT</b>  |
| hPTPalphalpha_PTPRA | QTDQMAYVFIY | <b>QALLEHYL</b> |
| hSHP1_PTPN6         | QTEAQYKFIY  | <b>VAIAQFIE</b> |
| hSHP2_PTPN11        | QTEAQYRFIY  | <b>MAVQHYIE</b> |
| hPTPBAS_PTPN13      | QTEDQYIFCY  | <b>QVILYVLT</b> |
| hLyPTP_PTPN22       | QTQEQYELVY  | <b>NAVLELFK</b> |
| hPEST_PTPN12        | QTKEQYELVH  | <b>RAIAQLFE</b> |
| hPTP1B_PTPN1        | QTADQLRFSY  | <b>LAVIEGAK</b> |
| hTCPTP_PTPN2        | QTPDQLRFSY  | <b>MAIIEGAK</b> |

|               |                             |
|---------------|-----------------------------|
| hMEG2_PTPN9   | QTPEQ <b>YYFCY</b> KAILEFAE |
| hMEG1_PTPN4   | QTPSQ <b>YRFVC</b> EAILKVYE |
| hPTPH1_PTPN3  | QTSSQ <b>YKFVC</b> EAILRVYE |
| hHDPTP_PTPN23 | QEKLH <b>LRFCY</b> EAVVRHVE |
